# Supplementary material
Source: PubMed Central journal article supplement (PMC9130110)

# Supplementary Figure 1

A

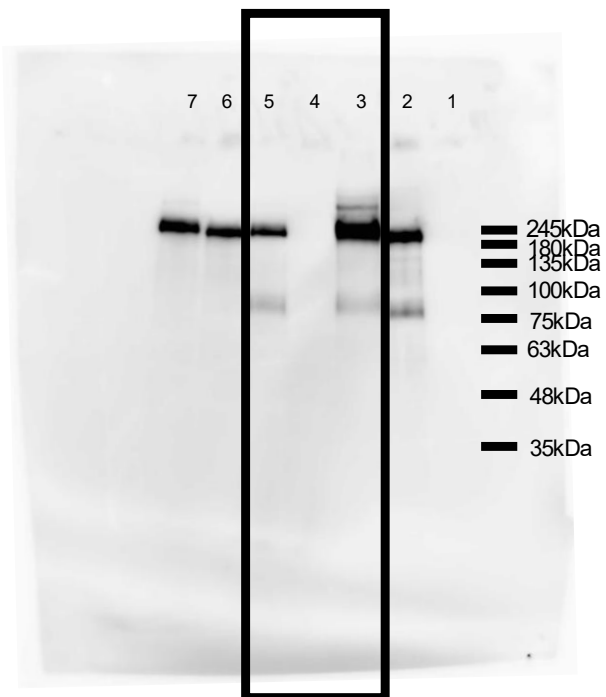

B

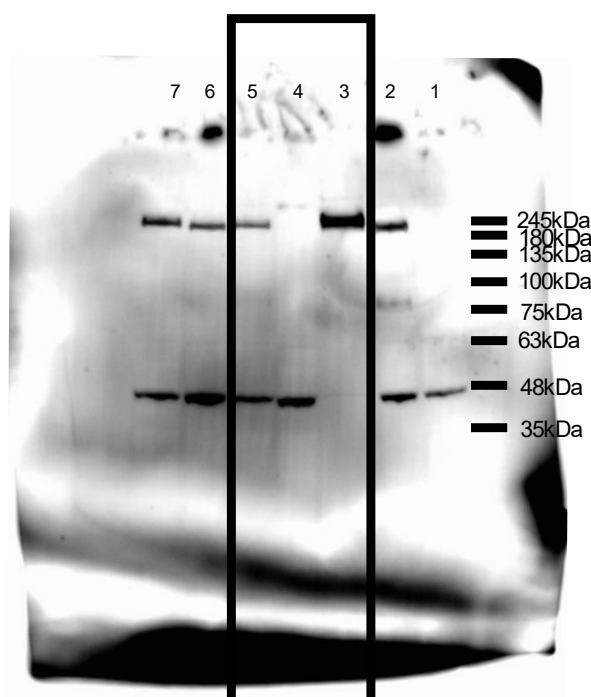

Supplement: mmc3.pdf [file mmc3.pdf]
